# Supplementary material for: Ticagrelor responsive platelet genes are associated with platelet function and bleeding
Source: bioRxiv or medRxiv preprint supplement (doi:10.1101/2022.03.18.22270280), 2022-03-18

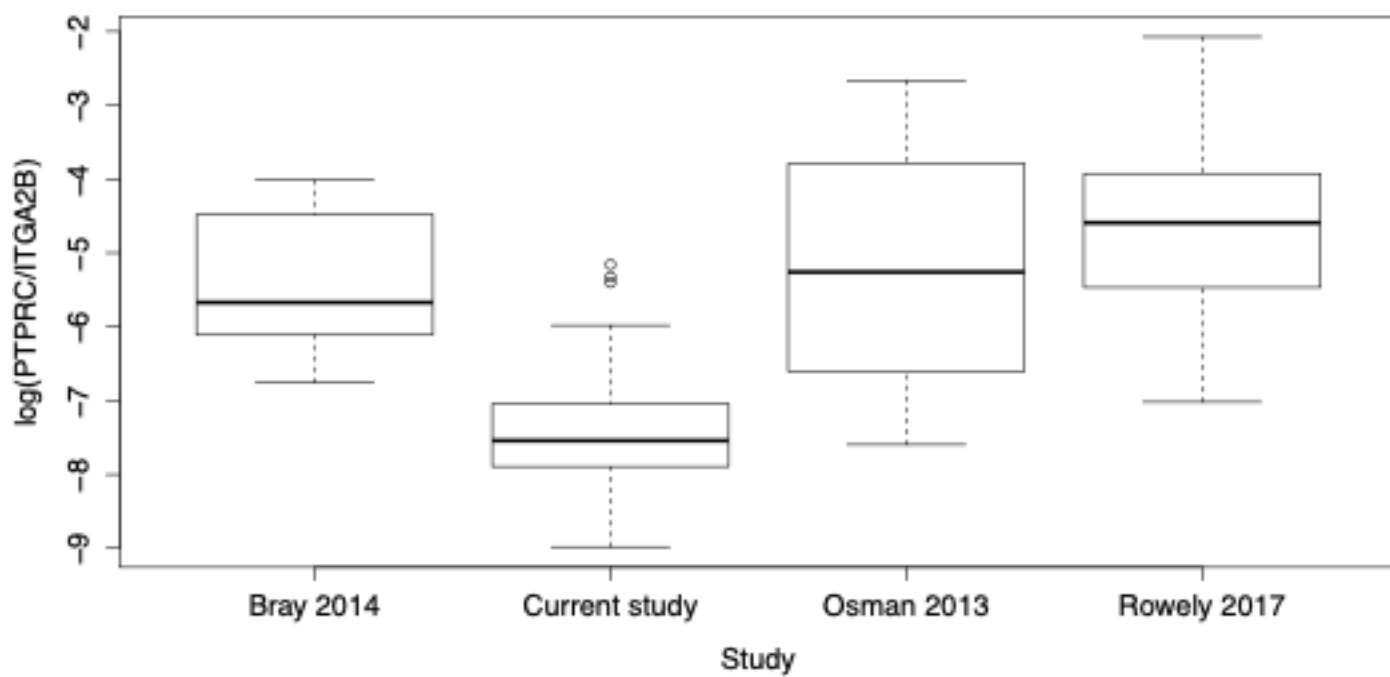

Supplement: Supplementary file [file media-1.pdf]
